# Supplementary material for: The Metallophore Staphylopine Enables Staphylococcus aureus To Compete with the Host for Zinc and Overcome Nutritional Immunity
Source: PubMed Central journal article supplement (PMC5666155; doi:10.1128/mbio.01281-17), 2017-10-31
Supplement: mbo005173560st1.pdf [file mbo005173560st1.pdf]

| Organism (UniProt ID, to distinguish between species)            | Pathway type | Pathway subtype |
|------------------------------------------------------------------|--------------|-----------------|
| #unknown (A0A0G9N3B2)                                            | EamA         | FecCD           |
| #unknown (A0A0M2W2B8)                                            | EamA         | FecCD           |
| Arsenophonus nasoniae (son-killer infecting Nasonia vitripennis) | EamA         | FecCD           |
| Clostridium argentinense CDC 2741                                | EamA         | FecCD           |
| Fusobacterium nucleatum CTI-1                                    | EamA         | FecCD           |
| Fusobacterium nucleatum subsp. animalis 7_1                      | EamA         | FecCD           |
| Fusobacterium ulcerans 12-1B                                     | EamA         | FecCD           |
| Fusobacterium ulcerans ATCC 49185                                | EamA         | FecCD           |
| Fusobacterium varium ATCC 27725                                  | EamA         | FecCD           |
| Klebsiella oxytoca (A0A168L0N9)                                  | EamA         | FecCD           |
| Serratia liquefaciens FK01                                       | EamA         | FecCD           |
| Serratia marcescens (A0A0G8B6E7)                                 | EamA         | FecCD           |
| Serratia marcescens (A0A0P0QDX9)                                 | EamA         | FecCD           |
| Serratia marcescens (A0A0U6G5J4)                                 | EamA         | FecCD           |
| Serratia marcescens (A0A1C3HCW1)                                 | EamA         | FecCD           |
| Serratia marcescens subsp. marcescens (A0A1C0CMK1)               | EamA         | FecCD           |
| Serratia nematodiphila DZ0503SBS1                                | EamA         | FecCD           |
| Serratia sp. YD25                                                | EamA         | FecCD           |
| Vibrio caribbeanicus ATCC BAA-2122                               | EamA         | FecCD           |
| Vibrio crassostreae (A0A0T7DF42)                                 | EamA         | FecCD           |
| Vibrio crassostreae 9CS106                                       | EamA         | FecCD           |
| Vibrio neptunius (A0A0F4PDU9)                                    | EamA         | FecCD           |
| Vibrio nigripulchritudo (U4KI97)                                 | EamA         | FecCD           |
| Vibrio nigripulchritudo FTn2                                     | EamA         | FecCD           |
| Vibrio sp. J2-29                                                 | EamA         | FecCD           |
| Vibrio sp. J2-4                                                  | EamA         | FecCD           |
| Yersinia intermedia (A0A0U1ENU9)                                 | EamA         | FecCD           |
| Yersinia pestis (Q0WH68)                                         | EamA         | FecCD           |
| Yersinia pestis (Q8CKU7)                                         | EamA         | FecCD           |
| Yersinia pestis biovar Orientalis str. IP275                     | EamA         | FecCD           |
| Yersinia pestis bv. Antiqua (strain Antiqua; A0A0E1NTQ7)         | EamA         | FecCD           |
| Yersinia pestis bv. Antiqua (strain Antiqua; A0A0H2Y4T7)         | EamA         | FecCD           |
| Yersinia pestis bv. Antiqua (strain Nepal516)                    | EamA         | FecCD           |
| Yersinia pseudotuberculosis (A0A0T9J5L2)                         | EamA         | FecCD           |
| Yersinia pseudotuberculosis (A0A0T9LUS4)                         | EamA         | FecCD           |
| Yersinia pseudotuberculosis serotype I (strain IP32953)          | EamA         | FecCD           |
| Yersinia pseudotuberculosis serotype O:1b (strain IP 31758)      | EamA         | FecCD           |

|                                                                                                                                          |      |       |
|------------------------------------------------------------------------------------------------------------------------------------------|------|-------|
| <i>Yersinia pseudotuberculosis</i> serotype O:3 (strain YPIII)                                                                           | EamA | FecCD |
| <i>Yersinia similis</i> (A0A0T9P242)                                                                                                     | EamA | FecCD |
| <i>Yersinia wautersii</i> (A0A0E8XDS6)                                                                                                   | EamA | FecCD |
| <i>Enterobacter cloacae</i> (A0A157U2K9)                                                                                                 | EamA | TonB  |
| <i>Pseudomonas aeruginosa</i> (A0A077JXG2)                                                                                               | EamA | TonB  |
| <i>Pseudomonas aeruginosa</i> (A0A0C7AQP6)                                                                                               | EamA | TonB  |
| <i>Pseudomonas aeruginosa</i> (A0A0V3SFR0)                                                                                               | EamA | TonB  |
| <i>Pseudomonas aeruginosa</i> (strain ATCC 15692 / DSM 22644 / CIP 104116 / JCM 14847 / LMG 12228 / 1C / PRS 101 / PAO1)                 | EamA | TonB  |
| <i>Pseudomonas aeruginosa</i> (strain PA7)                                                                                               | EamA | TonB  |
| <i>Pseudomonas aeruginosa</i> (strain UCBPP-PA14)                                                                                        | EamA | TonB  |
| <i>Pseudomonas aeruginosa</i> BL04                                                                                                       | EamA | TonB  |
| <i>Pseudomonas aeruginosa</i> DK1                                                                                                        | EamA | TonB  |
| <i>Pseudomonas aeruginosa</i> MTB-1                                                                                                      | EamA | TonB  |
| <i>Pseudomonas aeruginosa</i> str. Stone 130                                                                                             | EamA | TonB  |
| <i>Pseudomonas aeruginosa</i> VRFPA01                                                                                                    | EamA | TonB  |
| <i>Pseudomonas aeruginosa</i> VRFPA03 (no hemolysin)                                                                                     | EamA | TonB  |
| <i>Anaerobacillus macyae</i> (A0A0J6D1P8)                                                                                                | EamA | ABC   |
| <i>Bacillus aminovorans</i> (A0A177KXU3)                                                                                                 | EamA | ABC   |
| <i>Bacillus marmarensis</i> DSM 21297                                                                                                    | EamA | ABC   |
| <i>Bacillus</i> sp. FJAT-18019                                                                                                           | EamA | ABC   |
| <i>Fictibacillus arsenicus</i> (A0A1B1Z2E6)                                                                                              | EamA | ABC   |
| <i>Paenibacillus elgii</i> (A0A165QP91)                                                                                                  | EamA | ABC   |
| <i>Paenibacillus</i> sp. FJAT-22460                                                                                                      | EamA | ABC   |
| <i>Paenibacillus tyrfis</i> (A0A081PAT8)                                                                                                 | EamA | ABC   |
| <i>Fictibacillus phosphorivorans</i> (A0A160IK29)                                                                                        | EamA | n/a   |
| <i>Fusobacterium mortiferum</i> ATCC 9817 (C3WBZ5)                                                                                       | EamA | n/a   |
| <i>Actinokineospora spheciospongiae</i>                                                                                                  | MFS  | None  |
| <i>Actinosynnema mirum</i> (strain ATCC 29888 / DSM 43827 / NBRC 14064 / IMRU 3971)                                                      | MFS  | None  |
| <i>Aneurinibacillus migulanus</i> ( <i>Bacillus migulanus</i> )                                                                          | MFS  | None  |
| <i>Bacillus halodurans</i> (strain ATCC BAA-125 / DSM 18197 / FERM 7344 / JCM 9153 / C-125)                                              | MFS  | None  |
| <i>Bacillus okuhidensis</i>                                                                                                              | MFS  | None  |
| <i>Glutamicibacter arilaitensis</i> (strain DSM 16368 / CIP 108037 / IAM 15318 / JCM 13566 / Re117) ( <i>Arthrobacter arilaitensis</i> ) | MFS  | None  |
| <i>Paenibacillus glucanolyticus</i>                                                                                                      | MFS  | None  |
| <i>Paenibacillus mucilaginosus</i> (strain KNP414)                                                                                       | MFS  | None  |
| <i>Paenibacillus mucilaginosus</i> 3016                                                                                                  | MFS  | None  |
| <i>Paenibacillus mucilaginosus</i> K02                                                                                                   | MFS  | None  |
| <i>Paenibacillus naphthalenovorans</i>                                                                                                   | MFS  | None  |
| <i>Paenibacillus</i> sp. A3                                                                                                              | MFS  | None  |

|                                                        |     |      |
|--------------------------------------------------------|-----|------|
| Paenibacillus sp. FSL R5-192                           | MFS | None |
| Paenibacillus sp. FSL R5-808                           | MFS | None |
| Paenibacillus sp. FSL R7-0273                          | MFS | None |
| Paenibacillus sp. HGF5                                 | MFS | None |
| Paenibacillus sp. TCA20                                | MFS | None |
| Paenibacillus sp. VT-400                               | MFS | None |
| Staphylococcus argenteus                               | MFS | None |
| Staphylococcus aureus                                  | MFS | None |
| Staphylococcus aureus                                  | MFS | None |
| Staphylococcus aureus                                  | MFS | None |
| Staphylococcus aureus                                  | MFS | None |
| Staphylococcus aureus                                  | MFS | None |
| Staphylococcus aureus                                  | MFS | None |
| Staphylococcus aureus                                  | MFS | None |
| Staphylococcus aureus (strain COL)                     | MFS | None |
| Staphylococcus aureus (strain Mu50 / ATCC 700699)      | MFS | None |
| Staphylococcus aureus (strain MW2)                     | MFS | None |
| Staphylococcus aureus (strain N315)                    | MFS | None |
| Staphylococcus aureus (strain NCTC 8325)               | MFS | None |
| Staphylococcus aureus (strain Newman)                  | MFS | None |
| Staphylococcus aureus (strain USA300)                  | MFS | None |
| Staphylococcus aureus subsp. aureus                    | MFS | None |
| Staphylococcus aureus subsp. aureus                    | MFS | None |
| Staphylococcus aureus subsp. aureus 71193              | MFS | None |
| Staphylococcus aureus subsp. aureus CN1                | MFS | None |
| Staphylococcus aureus subsp. aureus MN8                | MFS | None |
| Staphylococcus aureus subsp. aureus USA300_TCH959      | MFS | None |
| Staphylococcus aureus subsp. aureus Z172               | MFS | None |
| Staphylococcus capitis                                 | MFS | None |
| Staphylococcus capitis                                 | MFS | None |
| Staphylococcus caprae M23864:W1                        | MFS | None |
| Staphylococcus chromogenes MU 970                      | MFS | None |
| Staphylococcus epidermidis                             | MFS | None |
| Staphylococcus epidermidis                             | MFS | None |
| Staphylococcus epidermidis (strain ATCC 12228)         | MFS | None |
| Staphylococcus epidermidis (strain ATCC 35984 / RP62A) | MFS | None |
| Staphylococcus epidermidis M23864:W2(grey)             | MFS | None |
| Staphylococcus epidermidis W23144                      | MFS | None |

|                                                           |     |             |
|-----------------------------------------------------------|-----|-------------|
| Staphylococcus epidermidis WI09                           | MFS | None        |
| Staphylococcus hyicus                                     | MFS | None        |
| Staphylococcus pasteurii                                  | MFS | None        |
| Staphylococcus pasteurii SP1                              | MFS | None        |
| Staphylococcus pseudintermedius                           | MFS | None        |
| Staphylococcus pseudintermedius                           | MFS | None        |
| Staphylococcus pseudintermedius                           | MFS | None        |
| Staphylococcus pseudintermedius (strain HKU10-03)         | MFS | None        |
| Staphylococcus schleiferi                                 | MFS | None        |
| Staphylococcus sp. DORA_6_22                              | MFS | None        |
| Staphylococcus sp. HGB0015                                | MFS | None        |
| Staphylococcus warneri (strain SG1)                       | MFS | None        |
| Staphylococcus xylosum                                    | MFS | None        |
| Streptococcus pneumoniae                                  | MFS | None        |
| Streptococcus pneumoniae                                  | MFS | None        |
| Bacillus cereus HuB4-4                                    | MFS | NAS         |
| Bacillus gaemokensis                                      | MFS | NAS         |
| Bacillus hemicellulosilyticus JCM 9152                    | MFS | NAS         |
| Bacillus sonorensis L12                                   | MFS | NAS         |
| Brevibacillus agri BAB-2500                               | MFS | NAS         |
| Glutamicibacter arilaitensis                              | MFS | NAS         |
| Paenibacillus amylolyticus                                | MFS | NAS         |
| Paenibacillus sp. 1ZS3-15                                 | MFS | NAS         |
| Paenibacillus sp. FSL R7-269                              | MFS | NAS         |
| Paenibacillus sp. HGF7                                    | MFS | NAS         |
| Paenibacillus sp. HGF7                                    | MFS | NAS         |
| Staphylococcus caprae M23864:W1                           | MFS | NAS         |
| Bacillus cereus                                           | MFS | Methyltrans |
| Bacillus litoralis                                        | MFS | Methyltrans |
| Bacillus mycoides                                         | MFS | Methyltrans |
| Bacillus sp. SA1-12                                       | MFS | Methyltrans |
| Brevibacillus brevis (Bacillus brevis)                    | MFS | Methyltrans |
| Brevibacillus brevis (strain 47 / JCM 6285 / NBRC 100599) | MFS | Methyltrans |
| Brevibacillus parabrevis                                  | MFS | Methyltrans |
| Brevibacillus sp. BC25                                    | MFS | Methyltrans |
| Paenibacillus sp. A59                                     | MFS | Methyltrans |
| Paenibacillus sp. AD87                                    | MFS | Methyltrans |
| Paenibacillus sp. BIHB4019                                | MFS | Methyltrans |

|                                          |     |             |
|------------------------------------------|-----|-------------|
| Paenibacillus sp. Leaf72                 | MFS | Methyltrans |
| Paenibacillus sp. Root52                 | MFS | Methyltrans |
| Staphylococcus agnetis                   | MFS | Methyltrans |
| Paenibacillus sp. HGF7 (F5LJV0)          | MFS | n/a         |
| Paenibacillus sp. MAEPY2 (A0A0A2UDG7)    | MFS | n/a         |
| Staphylococcus agnetis (A0A0S2F2G7)      | MFS | n/a         |
| Staphylococcus aureus (A0A0G2LVZ8)       | MFS | n/a         |
| Staphylococcus haemolyticus (A0A0U0VDE2) | MFS | n/a         |
